# Supplementary material for: Chemoproteomic target deconvolution of lipoic acid reveals Histone Deacetylases as the main targets
Source: Research Square preprint supplement (doi:10.21203/rs.3.rs-2277181/v1), 2022-12-02
Supplement: Supplementary file 1 [file adad03a86919a494e4d5e8f1.xlsx]

## Sheet: Sheet1
	HDAC Complex	Protein	pKdapp	Drug	Affinity Matrix	Cell Line
	CoREST/MiDAC/MIER	HDAC1	5.0528	R/S_Lipoic acid	iL	SW620
	CoREST/MiDAC/MIER	HDAC1	4.64094	R/S_Lipoic acid	iQ	SW620
	CoREST/MiDAC/MIER	HDAC2	5.23168	R/S_Lipoic acid	iL	SW620
	CoREST/MiDAC/MIER	HDAC2	4.54142	R/S_Lipoic acid	iQ	SW620
	NCoR-HDAC3	HDAC3	na	R/S_Lipoic acid	iQ	SW620
	none	HDAC8	4.36408	R/S_Lipoic acid	iQ	SW620
	none	HDAC6	4.99318	R/S_Lipoic acid	iL	SW620
	none	HDAC6	4.95593	R/S_Lipoic acid	iQ	SW620
	none	HDAC10	<3.5	R/S_Lipoic acid	iQ	SW620
	CoREST	GSE1	5.548	R/S_Lipoic acid	iL	SW620
	CoREST	GSE1	5.32863	R/S_Lipoic acid	iQ	SW620
	CoREST	HMG20A	5.09142	R/S_Lipoic acid	iQ	SW620
	CoREST	HMG20B	5.27622	R/S_Lipoic acid	iQ	SW620
	CoREST	KDM1A	6.29934	R/S_Lipoic acid	iL	SW620
	CoREST	KDM1A	5.42186	R/S_Lipoic acid	iQ	SW620
	CoREST	RCOR1	5.593	R/S_Lipoic acid	iL	SW620
	CoREST	RCOR1	5.04093	R/S_Lipoic acid	iQ	SW620
	CoREST	RCOR3	5.06941	R/S_Lipoic acid	iQ	SW620
	MiDAC	DNTTIP1	na	R/S_Lipoic acid	iQ	SW620
	MiDAC	ELMSAN1	na	R/S_Lipoic acid	iQ	SW620
	MIER	MIER1	5.12713	R/S_Lipoic acid	iQ	SW620
	NCoR-HDAC3	NCOR1	na	R/S_Lipoic acid	iQ	SW620
	NCoR-HDAC3	NCOR2	4.735	R/S_Lipoic acid	iQ	SW620
	NCoR-HDAC3	TBL1XR1	4.96323	R/S_Lipoic acid	iQ	SW620
	CoREST/MiDAC/MIER	HDAC1	4.95307	R/S-Lipoamide	iL	MV411
	CoREST/MiDAC/MIER	HDAC1	4.74498	R/S-Lipoamide	iQ	SW620
	CoREST/MiDAC/MIER	HDAC1	4.88216	R/S-Lipoamide	iL	SW620
	CoREST/MiDAC/MIER	HDAC2	4.99684	R/S-Lipoamide	iL	MV411
	CoREST/MiDAC/MIER	HDAC2	4.73744	R/S-Lipoamide	iQ	SW620
	CoREST/MiDAC/MIER	HDAC2	4.74039	R/S-Lipoamide	iL	SW620
	NCoR-HDAC3	HDAC3	4.905	R/S-Lipoamide	iL	MV411
	NCoR-HDAC3	HDAC3	na	R/S-Lipoamide	iQ	SW620
	none	HDAC8	na	R/S-Lipoamide	iL	MV411
	none	HDAC8	4.77874	R/S-Lipoamide	iQ	SW620
	none	HDAC6	5.01585	R/S-Lipoamide	iL	MV411
	none	HDAC6	5.01761	R/S-Lipoamide	iQ	SW620
	none	HDAC6	4.8296	R/S-Lipoamide	iL	SW620
	none	HDAC10	5.54325	R/S-Lipoamide	iL	MV411
	none	HDAC10	5.47199	R/S-Lipoamide	iQ	SW620
	none	HDAC10	na	R/S-Lipoamide	iL	SW620
	CoREST	GSE1	5.35947	R/S-Lipoamide	iL	MV411
	CoREST	GSE1	5.04928	R/S-Lipoamide	iQ	SW620
	CoREST	GSE1	5.58428	R/S-Lipoamide	iL	SW620
	CoREST	HMG20A	5.44056	R/S-Lipoamide	iL	MV411
	CoREST	HMG20A	4.81878	R/S-Lipoamide	iQ	SW620
	CoREST	HMG20B	5.34889	R/S-Lipoamide	iL	MV411
	CoREST	HMG20B	5.42386	R/S-Lipoamide	iQ	SW620
	CoREST	KDM1A	5.38573	R/S-Lipoamide	iL	MV411
	CoREST	KDM1A	5.1173	R/S-Lipoamide	iQ	SW620
	CoREST	KDM1A	4.944	R/S-Lipoamide	iL	SW620
	CoREST	RCOR1	5.64888	R/S-Lipoamide	iL	MV411
	CoREST	RCOR1	5.3223	R/S-Lipoamide	iQ	SW620
	CoREST	RCOR1	5.43326	R/S-Lipoamide	iL	SW620
	CoREST	RCOR3	5.1504	R/S-Lipoamide	iL	MV411
	CoREST	RCOR3	4.86941	R/S-Lipoamide	iQ	SW620
	MiDAC	DNTTIP1	5.34228	R/S-Lipoamide	iL	MV411
	MiDAC	DNTTIP1	5.05881	R/S-Lipoamide	iQ	SW620
	MiDAC	ELMSAN1	5.21536	R/S-Lipoamide	iL	MV411
	MiDAC	ELMSAN1	5.10394	R/S-Lipoamide	iQ	SW620
	MIER	MIER1	4.88243	R/S-Lipoamide	iQ	SW620
	NCoR-HDAC3	NCOR1	5.37519	R/S-Lipoamide	iQ	SW620
	NCoR-HDAC3	NCOR2	na	R/S-Lipoamide	iQ	SW620
	NCoR-HDAC3	TBL1XR1	5.04153	R/S-Lipoamide	iQ	SW620
